# Supplementary material for: Author Correction: Years of life lost to COVID-19 in 81 countries
Source: PubMed Central journal article supplement (PMC8044662; doi:10.1038/s41598-021-87640-x), 2021-04-14
Supplement: 41598_2021_87640_MOESM1_ESM.pdf [file 41598_2021_87640_MOESM1_ESM.pdf]

# Supplementary Information:

## Years of life lost to COVID-19 in 81 countries

Héctor Pifarré i Arolas,<sup>1\*</sup> Enrique Acosta,<sup>2</sup> Guillem López Casasnovas<sup>1</sup>,  
Adeline Lo<sup>3</sup>, Catia Nicodemo<sup>4</sup>, Tim Riffe<sup>2</sup>, & Mikko Myrskylä<sup>2,5</sup>

<sup>1</sup>Centre for Research in Health Economics, Universitat Pompeu Fabra, 08002 Barcelona, Spain

<sup>2</sup>Max Planck Institute for Demographic Research, 18057 Rostock, Germany

<sup>3</sup>Department of Political Science, University of Wisconsin-Madison, 53706 Madison, WI

<sup>4</sup>Centre of Organisation, Department of Primary Economics, University of Oxford, OX1 3UQ Oxford, UK

<sup>5</sup>Center for Social Data Science, University of Helsinki, 00014 Helsinki, Finland

\*To whom correspondence should be addressed; E-mail: hector.pifarre@upf.edu.

March 31, 2021

### This PDF file includes:

- Methods: a description of the methods and data sources.
- Additional tables and figures:
  - Description of SI Figures and Tables
  - Figures S1-S11
  - Tables S1-S7

## Methods

### Calculation of years of life lost (YLL)

To measure the impact of COVID-19 in terms of premature mortality, in the outbreak spanning January 2020 to December 2020<sup>1</sup>, we calculate the years of life lost (YLL) for a person who dies at a given age due to COVID-19 as the difference between their age at death and their life expectancy at that given age [1].

The age specific life expectancy is extracted from the country-specific life tables in WPP. This approach differs slightly from existing YLL exercises such as the GBD study [2] which uses a single best-practices life table to measure life expectancy countries. Here country-specific tables are more applicable under the premise that the focus of the study is not of trends, but rather in evaluating the magnitude of the premature mortality impacts of COVID-19 at this time. For the same reason, we additionally compute YLL rates per 100,000 people based on country specific population, instead of the more common route of utilizing a standard population. In this setting, our YLL rates do not disentangle the effects of country-specific age structures

---

<sup>1</sup>Per country span of data differs, see Table S1 for details.

## Comparisons with other causes of mortality

For heart conditions (cardiovascular diseases) and traffic accidents (transport injuries), we use mortality data collected from the GBD [3] in 2017 (cause IDs 491 and 688 respectively on the database). There is substantial variation in the mortality burden of the flu by country across years. To better illustrate the context, we calculate YLL rates for the worst flu and median flu years for each country in the period 1990-2017. We select years according to the YLL rates following our approach described above.

## Selection of Respiratory infections and Pneumonia and Influenza as causes of death

The identification of influenza mortality is challenging because influenza tests are rarely performed, and substantial influenza-related mortality is the consequence of exacerbation of preexisting medical conditions. Therefore, most of the deaths from influenza are classified within other causes, such as respiratory and cardiovascular diseases. Usually, the estimation of influenza mortality is done by applying a Serfling model to monthly or weekly mortality to broader groups of causes of death, ideally including influenza surveillance information [4].

Nevertheless, for most of the countries under analysis, influenza epidemics severity had considerable differences and the detailed information for obtaining direct measures of mortality from influenza by age is not available. For comparability reasons, we selected all-cause mortality involving pneumococcal pneumonia, H influenzae type B, and influenza as etiology from the GDB data [3] (cause IDs 188, 189, and 187 respectively on the databases).

## Excess mortality

We compute excess deaths for 19 countries with available weekly mortality data. A mortality baseline is estimated for each country, sex and age group by fitting a Poisson model to weekly all-cause mortality since the first week of 2010. Mortality excess here is defined as the difference between observed mortality and the baseline. For the calculation of excess mortality attributable to COVID-19, we compute the cumulative positive excess mortality since the last week of February 2020. This is then compared to official death counts for COVID-19 around comparable dates.

The model has three main components: a sinusoidal component accounting for annual seasonality, a nonlinear trend component using 3-knots splines accounting for secular changes in mortality, and an offset controlling for changes in the exposure over time. In each case, the inclusion of the seasonal component is decided by selecting the model with the best AIC value [5].

Mortality excess is defined as the observed mortality minus the baseline. We compute bootstrapped 95% prediction intervals of the excess mortality (2000 iterations). For the calculation of excess mortality attributable to COVID-19, we calculate the cumulative positive excess mortality since the last week of February 2020. Results are reported in SI Table S3. As noted by the HMD, the mortality counts during the most recent weeks (one to three) is incomplete due to delayed registration of deaths [6]. Thus, to ensure data completeness, we excluded the last three weeks in all countries for the estimation of excess mortality.

## Projections

It is inherently difficult to extricate these measures from the policy contexts in which they are calculated. Are certain countries experiencing lower YLL than others due to more rigid policy measures (e.g. stay-at-home orders, mask enforcement)? To attain some sense of policy context, we take projections of the number of COVID-19 deaths in 2020 under a policy scenario of no intervention, with different disease transmission (so-called  $R_0$ ) rates [7] and produce similar calculations of years of life lost. The data used is obtained from the original report behind the publication and is retrieved from: <https://www.imperial.ac.uk/media/imperial-college/medicine/sph/ide/gida-fellowships/Imperial-College-COVID19-Global-unmitigated-mitigated-suppression-scenarios.xlsx>. The results of these exercises are shown in SI Appendix Table S3.

## Gender imbalances

SI Appendix Table S4 reports key figures behind the gender disparity in the impact of COVID-19, by country: 1) a higher average age-at-death of female COVID-19 deaths, resulting in a relatively lower YLL per death (16.6 and 16 for males and females respectively); and 2) more male deaths than female deaths in absolute number.

In order to provide a policy relevant magnitude of the gender imbalance, we calculate the reduction in male death counts needed for perfect parity. We hold differential age pattern of death across genders constant and reduce male death counts up to the point in which YLL rates are equal across genders. The resulting death counts reductions are presented in SI Appendix Table S5 in terms of the ratio of equalizing to current death counts. The mean across countries, weighted by number of deaths and unweighted, is 0.69 and 0.66 respectively.

## Additional tables and figures

**Sample description and additional information** Detailed key information on the sample and on the calculations reported in the main text.

- Table S1 reports sample of countries including in the analysis and, for each country, the reference date, overall and gender specific death counts.
- Table S2 reports the sub-sample used in the excess mortality calculations, with its specific reference dates and overall cumulative actual death counts and estimated excess deaths.
- Table S3 compares figures of both death counts and YLL for the current and projected impact of COVID-19.
- Table S4 reports gender specific measures of the impact of the pandemic by country.
- Table S5 displays the reduction in male deaths needed to equalize the impact of the pandemic across genders in terms of YLL.
- Table S6 reports the weighted averages for Figure 1 in the main text, and Table S7 for those in Figure 2.

**Pandemic stage and premature mortality impact** Countries are experiencing different stages of the pandemic trajectory. We measure that stage based on the days since the first COVID-19 case and provide suggestive evidence that later stages are associated with a higher burden of premature mortality. Figures S1 through S6 investigate this plot this relationship for a variety of outcomes. Figures S7, S8 and S9 show alternative representations of the age and gender imbalance in YLL. Figures S10 and S11 provide additional information on the excess mortality estimates.

- Figure S1 plots the growth of years of life lost with increase of days from first COVID-19 case.
- Figure S2 plots the ratio the ratio COVID-19 YLL over other causes of mortality YLL and excess mortality, graphed against increase of days from first COVID-19 case.
- Figure S3 through S6 display the plots in figure S2 separately.
- Figure S7 plots the proportion of YLL from two age groups as days from first COVID-19 case increases.
- Figure S8 plots YLL rates from male and female subgroups as days from first COVID-19 case increases.
- Figure S9 plots replicates Figure 2 from the main manuscript, with ratio of male YLL rates over female YLL rates on log x-axis scale.

**Excess mortality** Supplementary information on the output of the predictive models of mortality.

- Figures S10 and S11 report the excess mortality and death counts estimates from our excess mortality models.

# Figures S1 to S11

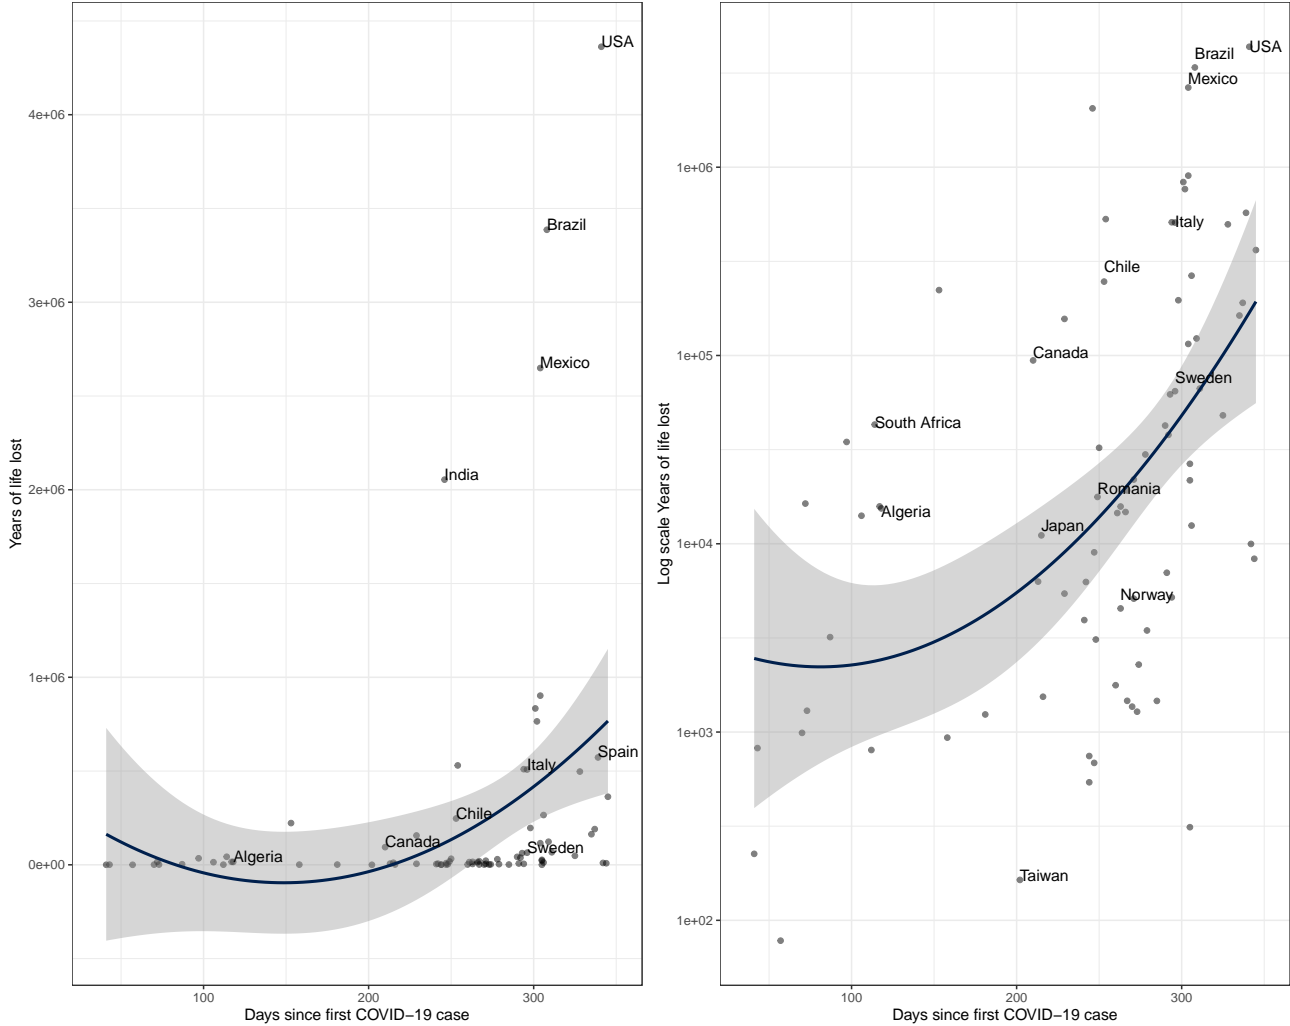

Figure S1: Growth of years of life lost with increase of days from first official COVID-19 case. Left panel plots days of first case against years of life lost, while right panel plots days of first case against log scale years or life lost. Polynomial order 2 curve fit against data.

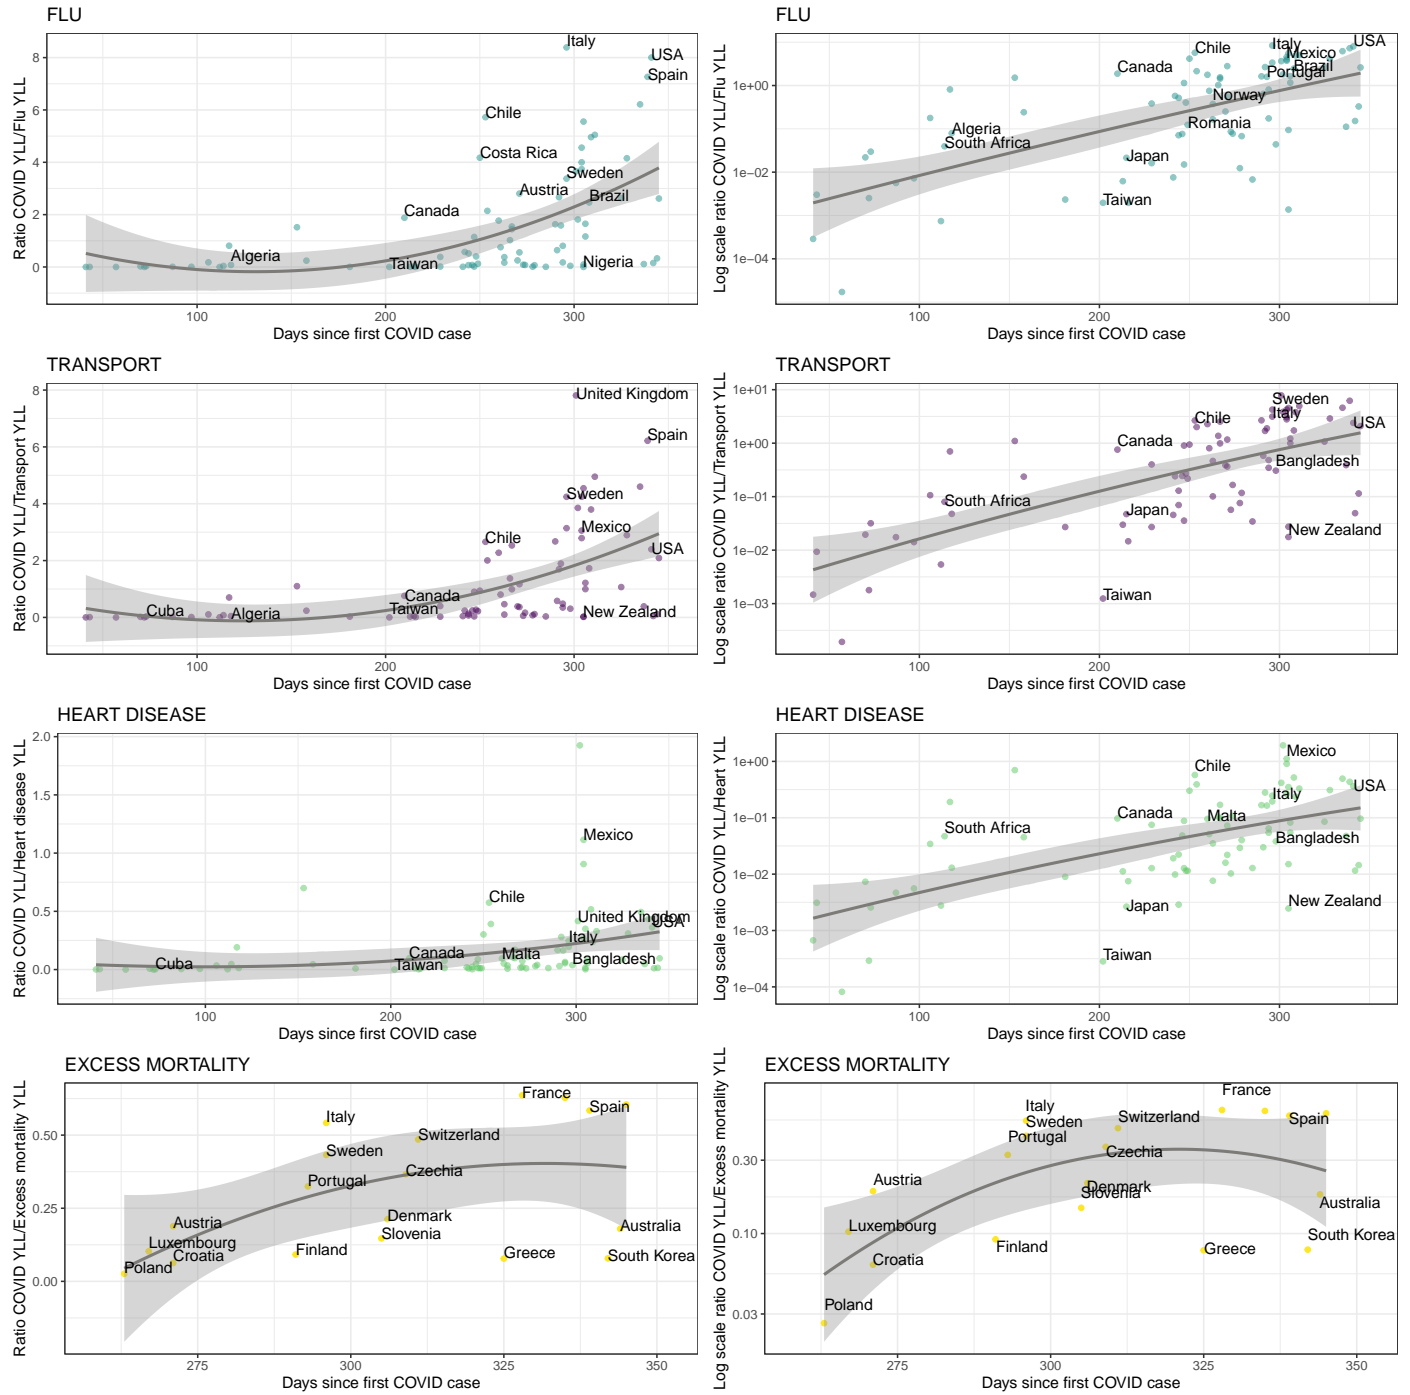

Figure S2: Ratio COVID-19 YLL over other causes of mortality YLL, graphed against increase of days from first COVID-19 case. Left column plots days of first case against ratio, while right panel plots days of first case against log scale ratio. Flu year used is median impact flu year for each country. Polynomial order 2 curve fit against data.

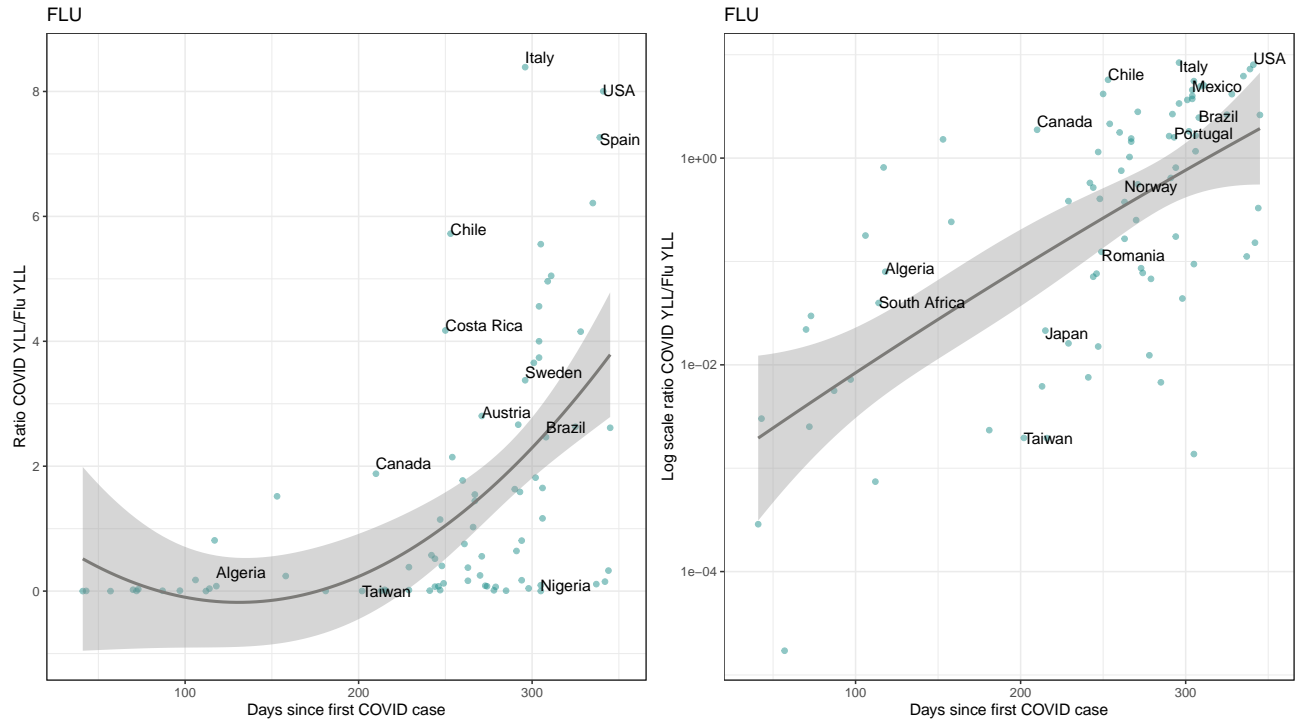

Figure S3: Ratio COVID-19 YLL over flu mortality YLL, graphed against increase of days from first COVID-19 case. Left plots days of first case against ratio, while right plots days of first case against log scale ratio. Flu year used is median impact flu year for each country. Polynomial order 2 curve fit against data.

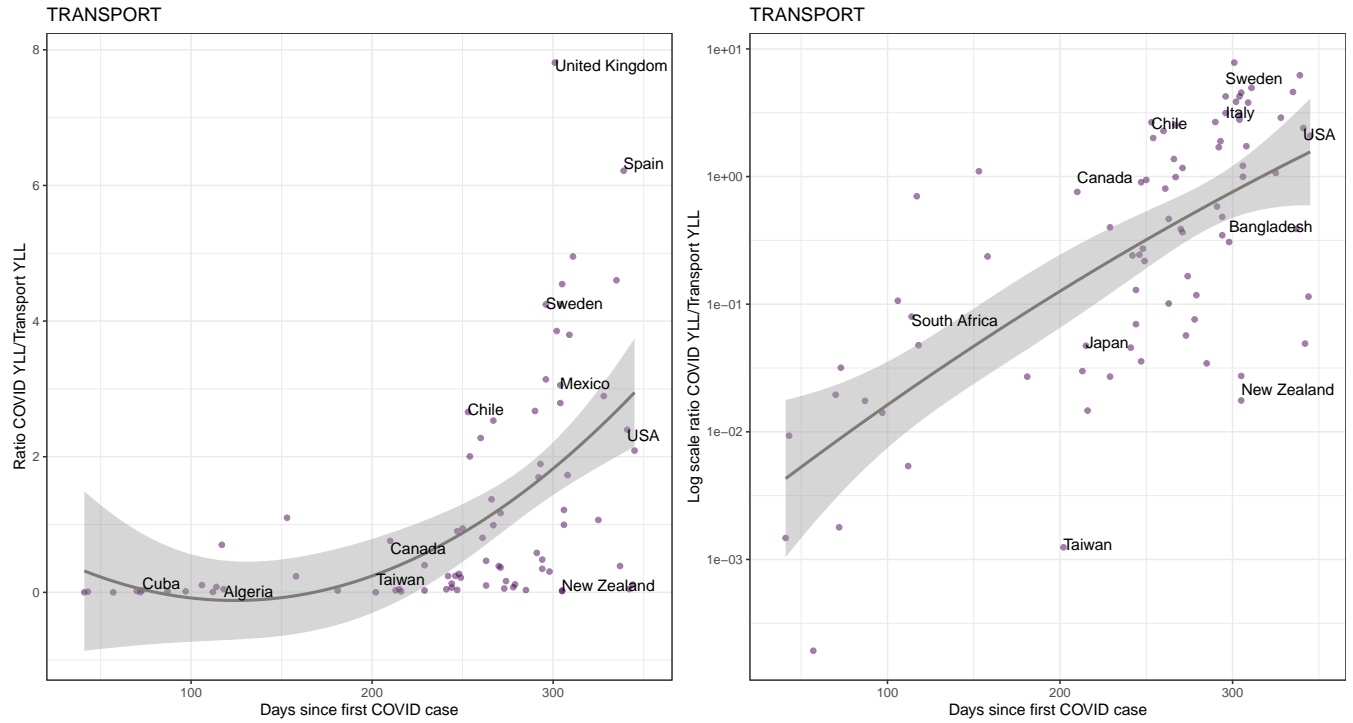

Figure S4: Ratio COVID-19 YLL over transport mortality YLL, graphed against increase of days from first COVID-19 case. Left plots days of first case against ratio, while right plots days of first case against log scale ratio. Polynomial order 2 curve fit against data.

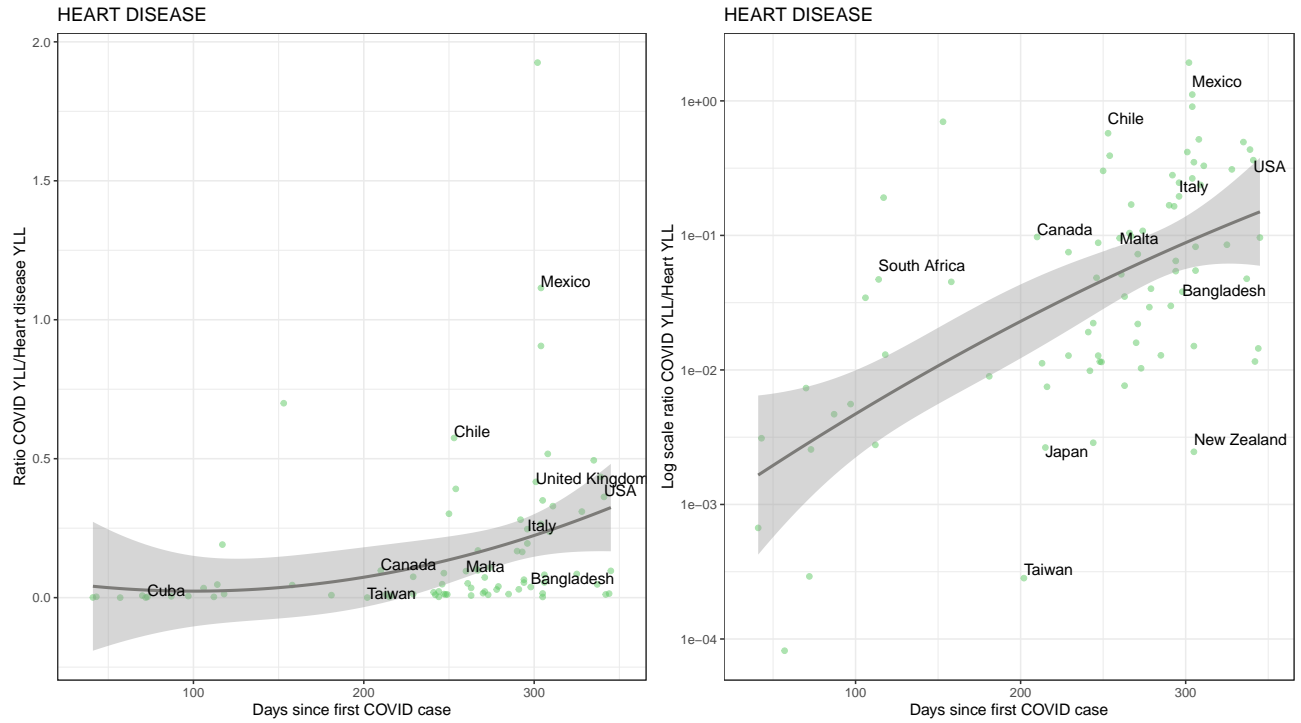

Figure S5: Ratio COVID-19 YLL over heart disease YLL, graphed against increase of days from first COVID-19 case. Left plots days of first case against ratio, while right plots days of first case against log scale ratio. Polynomial order 2 curve fit against data.



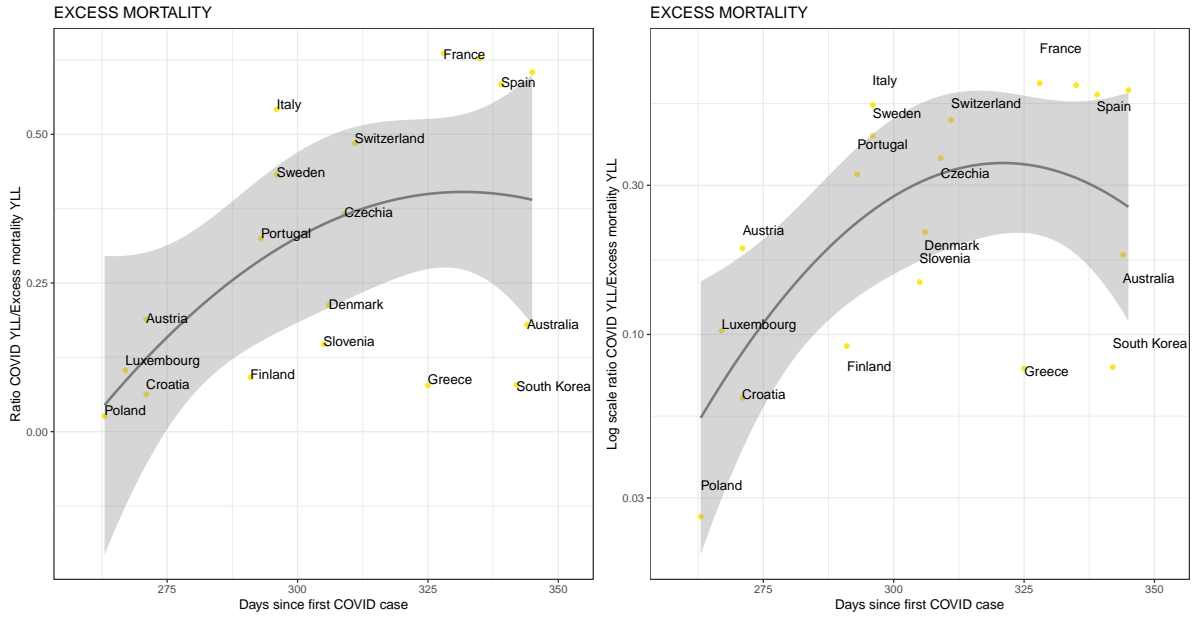

Figure S6: Ratio COVID-19 YLL over excess mortality YLL, graphed against increase of days from first COVID-19 case. Left plots days of first case against ratio, while right plots days of first case against log scale ratio. Polynomial order 2 curve fit against data.

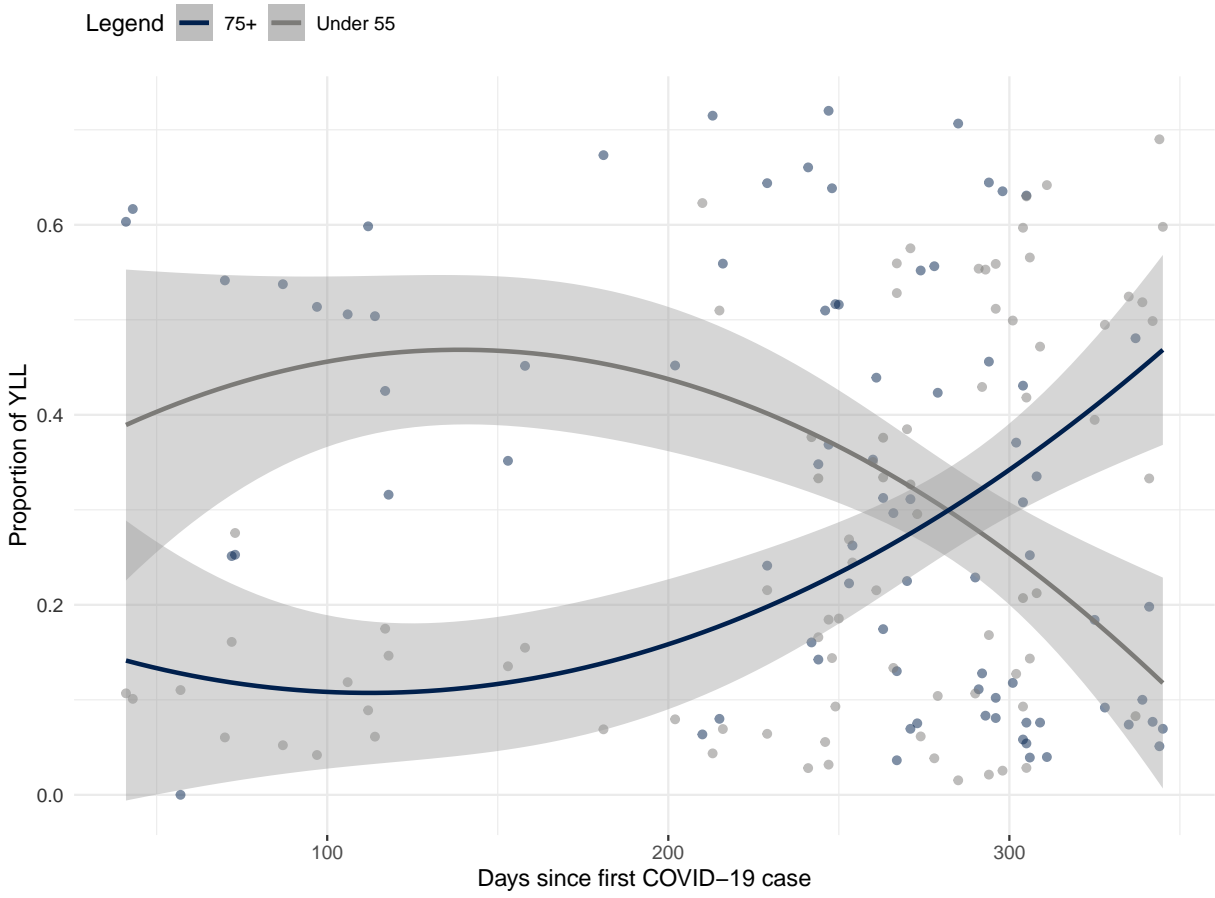

Figure S7: Proportion of YLL from two age groups as days from first COVID-19 case increases. Polynomial order 2 curve fit against data.

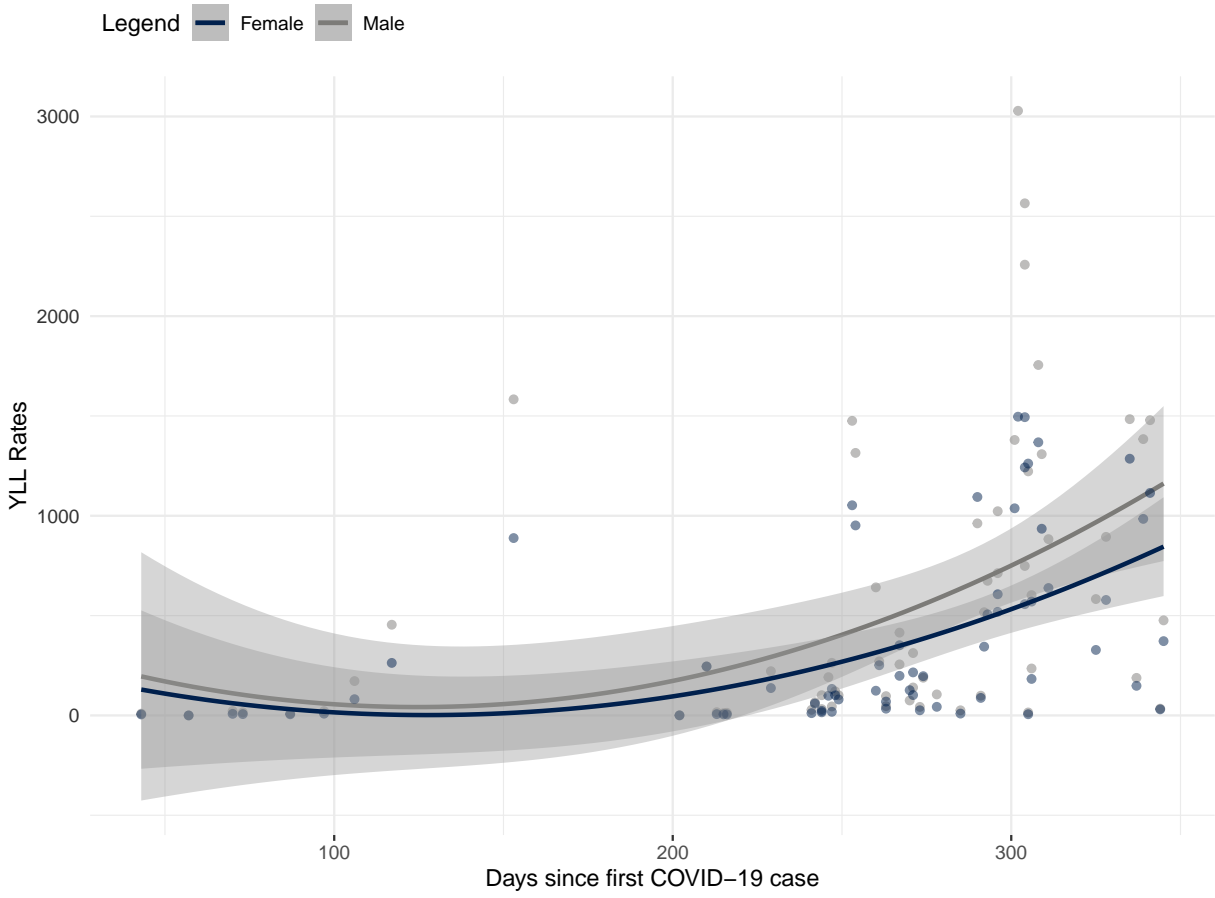

Figure S8: YLL rates from male and female subgroups as days from first COVID-19 case increases. Polynomial order 2 curve fit against data.

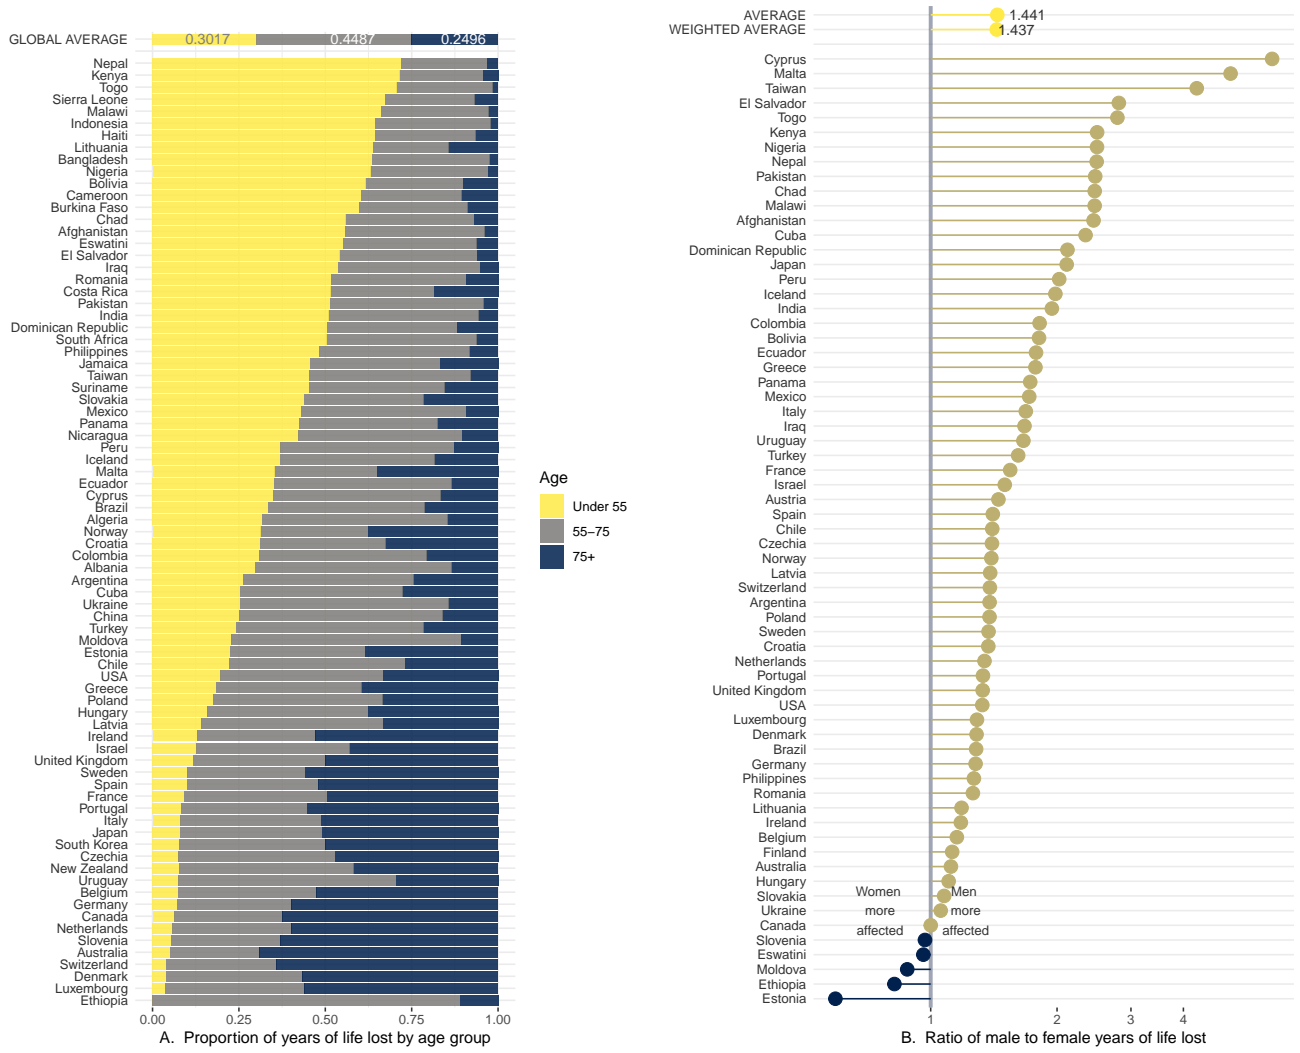

Figure S9: Replication of Figure 2 from main manuscript, with ratio of male YLL rates over female YLL rates on log x-axis scale.

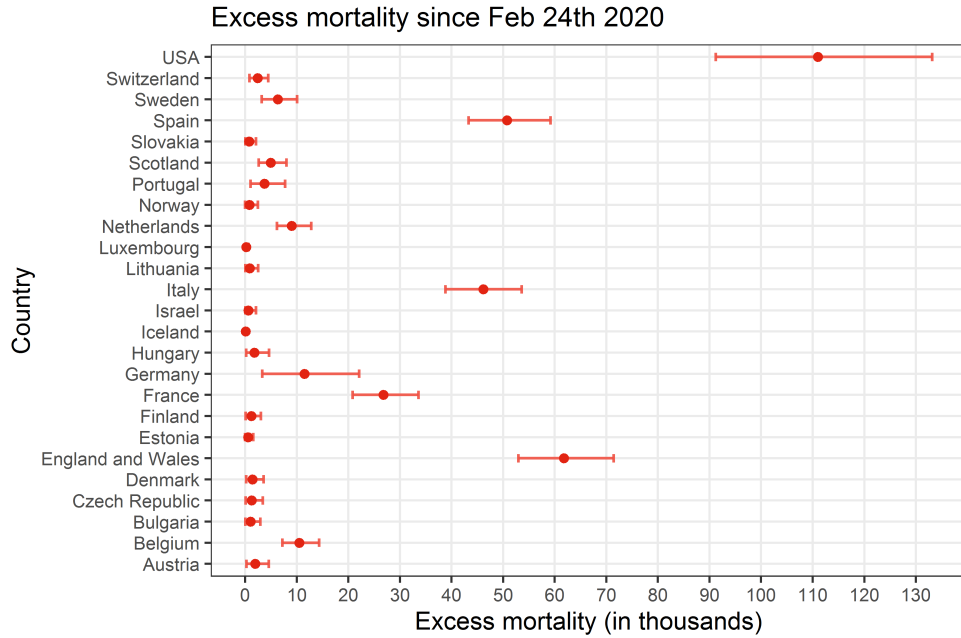

Figure S10: Excess mortality and its 95% prediction interval by country, for all ages and both sexes. Excess mortality is defined as the difference between the observed and predicted mortality baseline, between February 24, 2020 and the last week in which mortality was observed in each country.

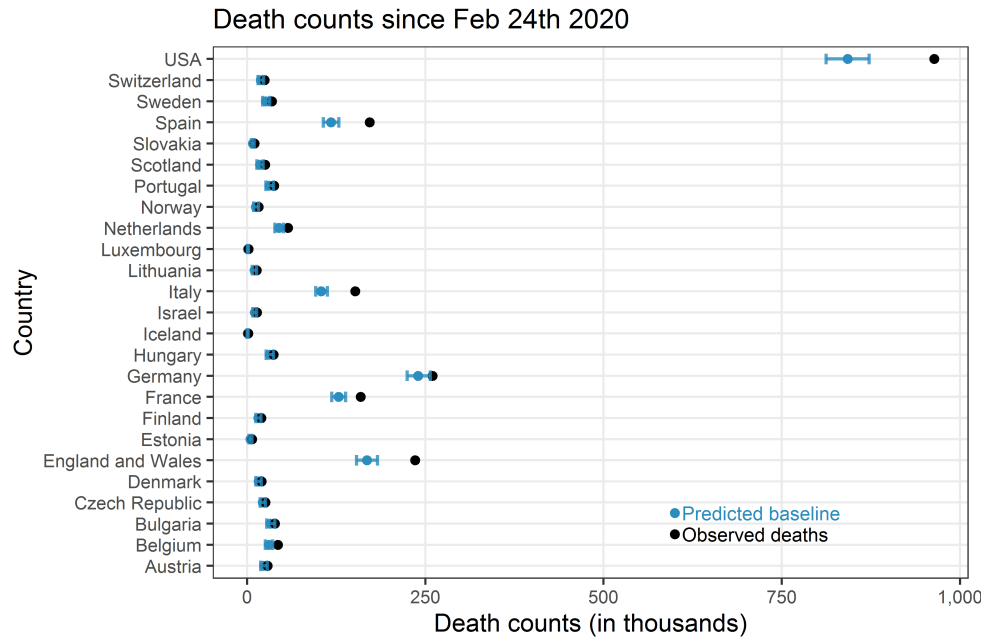

Figure S11: Total observed (in black) and predicted mortality baseline (in blue), for all ages and both sexes, between February 24, 2020 and the last week of observation in each country.

## Tables S1 to S7

Table S1: COVID-19 attributed deaths by date, country and gender.

| Country            | Date       | Both   | Males  | Females |
|--------------------|------------|--------|--------|---------|
| Afghanistan        | 2020-11-28 | 1511   | 1130   | 381     |
| Albania            | 2020-12-02 | 839    | NA     | NA      |
| Algeria            | 2020-06-22 | 852    | NA     | NA      |
| Argentina          | 2020-11-12 | 34759  | 19786  | 14973   |
| Australia          | 2021-01-03 | 910    | 440    | 470     |
| Austria            | 2020-11-22 | 2151   | 1366   | 1107    |
| Bangladesh         | 2020-12-31 | 7559   | NA     | NA      |
| Belgium            | 2021-01-04 | 19724  | 9652   | 10072   |
| Bolivia            | 2020-04-22 | 34     | 22     | 12      |
| Brazil             | 2020-12-29 | 186406 | 106654 | 79753   |
| Burkina Faso       | 2020-06-30 | 53     | NA     | NA      |
| Cameroon           | 2020-04-16 | 18     | 13     | 5       |
| Canada             | 2020-09-22 | 9188   | 4435   | 4754    |
| Chad               | 2020-10-21 | 92     | 70     | 22      |
| Chile              | 2020-11-11 | 14777  | 8463   | 6314    |
| China              | 2020-02-11 | 1023   | NA     | NA      |
| Colombia           | 2021-01-04 | 49665  | 31736  | 17929   |
| Costa Rica         | 2020-11-10 | 1502   | NA     | NA      |
| Croatia            | 2020-11-22 | 400    | 208    | 192     |
| Cuba               | 2020-05-24 | 82     | 52     | 30      |
| Cyprus             | 2020-11-08 | 42     | 32     | 10      |
| Czechia            | 2021-01-04 | 11258  | 6314   | 4944    |
| Denmark            | 2020-12-29 | 1226   | 684    | 542     |
| Dominican Republic | 2020-06-15 | 615    | 433    | 182     |
| Ecuador            | 2020-07-31 | 10615  | 7025   | 3590    |
| El Salvador        | 2020-05-28 | 42     | 31     | 11      |
| Estonia            | 2020-11-22 | 111    | 42     | 69      |
| Eswatini           | 2020-12-10 | 126    | 72     | 54      |
| Ethiopia           | 2020-05-09 | 5      | 2      | 3       |
| Finland            | 2020-11-15 | 669    | 204    | 210     |
| France             | 2020-12-17 | 41299  | 24268  | 17031   |
| Germany            | 2021-01-04 | 35514  | 18573  | 16941   |
| Greece             | 2020-12-16 | 3870   | 2314   | 1556    |
| Haiti              | 2020-11-04 | 232    | NA     | NA      |
| Hungary            | 2020-11-01 | 539    | 264    | 275     |
| Iceland            | 2020-11-01 | 35     | 20     | 15      |
| India              | 2020-10-02 | 100875 | 69887  | 30988   |
| Indonesia          | 2020-12-21 | 20085  | NA     | NA      |
| Iraq               | 2020-05-24 | 160    | 110    | 50      |
| Ireland            | 2020-11-22 | 1758   | 914    | 844     |
| Israel             | 2020-12-09 | 2932   | 1670   | 1262    |
| Italy              | 2020-11-22 | 43793  | 25257  | 18536   |
| Jamaica            | 2020-12-29 | 298    | NA     | NA      |
| Japan              | 2020-08-18 | 825    | 531    | 294     |
| Kenya              | 2020-10-11 | 280    | 210    | 70      |
| Latvia             | 2020-11-01 | 42     | 23     | 19      |
| Lithuania          | 2020-11-01 | 138    | 68     | 70      |
| Luxembourg         | 2020-11-22 | 159    | 82     | 77      |

Table S1: COVID-19 attributed deaths by date, country and gender. *(continued)*

| Country        | Date       | Both   | Males  | Females |
|----------------|------------|--------|--------|---------|
| Malawi         | 2020-11-29 | 185    | 141    | 44      |
| Malta          | 2020-11-22 | 121    | 90     | 31      |
| Mexico         | 2020-12-28 | 122855 | 77991  | 44864   |
| Moldova        | 2020-12-23 | 2825   | 1457   | 1368    |
| Nepal          | 2020-09-26 | 360    | 258    | 102     |
| Netherlands    | 2020-12-27 | 11303  | 6181   | 5122    |
| New Zealand    | 2020-12-29 | 25     | NA     | NA      |
| Nicaragua      | 2020-12-23 | 164    | NA     | NA      |
| Nigeria        | 2020-11-28 | 1163   | 869    | 294     |
| Norway         | 2020-11-15 | 353    | 189    | 164     |
| Pakistan       | 2020-06-02 | 1688   | 1252   | 436     |
| Panama         | 2020-07-04 | 720    | 478    | 242     |
| Peru           | 2021-01-02 | 37835  | 25885  | 11950   |
| Philippines    | 2021-01-01 | 9213   | 5554   | 3659    |
| Poland         | 2020-11-22 | 1132   | 630    | 502     |
| Portugal       | 2020-12-20 | 6191   | 3220   | 2971    |
| Romania        | 2020-11-01 | 842    | 500    | 342     |
| Sierra Leone   | 2020-09-28 | 72     | NA     | NA      |
| Slovakia       | 2020-11-22 | 878    | 452    | 426     |
| Slovenia       | 2021-01-03 | 2891   | 1319   | 1572    |
| South Africa   | 2020-06-27 | 2413   | NA     | NA      |
| South Korea    | 2020-12-27 | 808    | NA     | NA      |
| Spain          | 2021-01-04 | 50900  | 27838  | 23062   |
| Suriname       | 2020-08-18 | 54     | NA     | NA      |
| Sweden         | 2020-11-22 | 6553   | 3563   | 2990    |
| Switzerland    | 2021-01-01 | 7082   | 3811   | 3272    |
| Taiwan         | 2020-08-10 | 7      | 6      | 1       |
| Togo           | 2020-12-16 | 66     | 45     | 21      |
| Turkey         | 2020-10-26 | 9799   | 6042   | 3756    |
| Ukraine        | 2021-01-03 | 17395  | 9298   | 8097    |
| United Kingdom | 2020-11-27 | 73124  | 40213  | 32911   |
| Uruguay        | 2020-12-11 | 90     | 59     | 31      |
| USA            | 2020-12-26 | 301671 | 163633 | 138038  |



Table S2: Estimated excess deaths and COVID-19 deaths.

| <b>Country</b> | <b>Date</b> | <b>Excess deaths</b> | <b>COVID-19 deaths</b> |
|----------------|-------------|----------------------|------------------------|
| Australia      | 2020-10-04  | 2562                 | 860                    |
| Austria        | 2020-11-08  | 5174                 | 1300                   |
| Belgium        | 2020-11-29  | 23599                | 16748                  |
| Croatia        | 2020-11-08  | 4093                 | 197                    |
| Czechia        | 2020-11-01  | 9487                 | 3812                   |
| Denmark        | 2020-12-13  | 2751                 | 950                    |
| Finland        | 2020-12-06  | 3168                 | 415                    |
| France         | 2020-11-15  | 55628                | 30871                  |
| Germany        | 2020-11-22  | 24552                | 19523                  |
| Greece         | 2020-10-11  | 5364                 | 449                    |
| Italy          | 2020-10-11  | 68154                | 36233                  |
| Luxembourg     | 2020-11-15  | 583                  | 141                    |
| Poland         | 2020-11-22  | 50801                | 1132                   |
| Portugal       | 2020-11-29  | 12092                | 4505                   |
| Slovenia       | 2020-11-01  | 2036                 | 440                    |
| South Korea    | 2020-09-13  | 3868                 | 358                    |
| Spain          | 2020-11-29  | 85180                | 46438                  |
| Sweden         | 2020-11-08  | 9951                 | 6016                   |
| Switzerland    | 2020-11-22  | 6417                 | 3788                   |

Table S3: Current and projected: COVID-19 deaths and YLL rates.

| Country            | Deaths Current | Projected | YLL rates Current | Projected | Ratio of YLL Current over proj. |
|--------------------|----------------|-----------|-------------------|-----------|---------------------------------|
| Afghanistan        | 1511           | 74381     | 76.568            | 3768.934  | 49.223                          |
| Albania            | 839            | 15342     | 512.413           | 9367.771  | 18.282                          |
| Algeria            | 852            | 171534    | 35.136            | 7074.746  | 201.355                         |
| Argentina          | 34759          | 212412    | 1172.818          | 7167.122  | 6.111                           |
| Australia          | 910            | 146707    | 32.645            | 5262.867  | 161.216                         |
| Austria            | 2151           | 59573     | 243.525           | 6744.532  | 27.695                          |
| Bangladesh         | 7559           | 592125    | 119.341           | 9348.323  | 78.333                          |
| Belgium            | 19724          | 91586     | 1420.122          | 6594.200  | 4.643                           |
| Bolivia            | 34             | 41442     | 7.042             | 8557.712  | 1215.308                        |
| Brazil             | 186406         | 908009    | 1593.215          | 7760.778  | 4.871                           |
| Burkina Faso       | 53             | 36433     | 3.840             | 2639.983  | 687.415                         |
| Cameroon           | 18             | 50535     | 0.849             | 2411.725  | 2839.045                        |
| Canada             | 9188           | 266741    | 249.430           | 7241.392  | 29.032                          |
| Chad               | 92             | 28507     | 9.376             | 2908.397  | 310.196                         |
| Chile              | 14777          | 96205     | 1291.462          | 8408.005  | 6.510                           |
| China              | 1023           | 8642939   | 1.136             | 9595.971  | 8447.795                        |
| Colombia           | 49665          | 208179    | 1772.999          | 7431.816  | 4.192                           |
| Costa Rica         | 1502           | 22929     | 634.897           | 9692.755  | 15.267                          |
| Croatia            | 400            | 28100     | 124.519           | 8749.644  | 70.268                          |
| Cuba               | 82             | 69278     | 11.460            | 9681.790  | 844.854                         |
| Cyprus             | 42             | 6392      | 61.774            | 9401.475  | 152.190                         |
| Czechia            | 11258          | 67843     | 1156.169          | 6967.308  | 6.026                           |
| Denmark            | 1226           | 37521     | 214.595           | 6567.011  | 30.602                          |
| Dominican Republic | 615            | 39710     | 129.872           | 8385.740  | 64.569                          |
| Ecuador            | 10615          | 63996     | 1260.959          | 7602.103  | 6.029                           |
| El Salvador        | 42             | 25395     | 15.266            | 9230.231  | 604.643                         |
| Estonia            | 111            | 8885      | 102.865           | 8241.226  | 80.117                          |
| Eswatini           | 126            | 2909      | 196.686           | 4544.565  | 23.106                          |
| Ethiopia           | 5              | 265429    | 0.068             | 3600.819  | 53085.800                       |
| Finland            | 669            | 36230     | 127.181           | 6887.533  | 54.155                          |
| France             | 41299          | 621256    | 761.754           | 11459.094 | 15.043                          |
| Germany            | 35514          | 722405    | 433.312           | 8814.184  | 20.341                          |
| Greece             | 3870           | 76798     | 461.365           | 9155.294  | 19.844                          |
| Haiti              | 232            | 31462     | 47.679            | 6465.799  | 135.612                         |
| Hungary            | 539            | 61425     | 64.869            | 7392.572  | 113.961                         |
| Iceland            | 35             | 1892      | 200.959           | 10863.292 | 54.057                          |
| India              | 100875         | 5513476   | 148.830           | 8134.515  | 54.657                          |
| Indonesia          | 20085          | 1056765   | 186.437           | 9809.242  | 52.614                          |
| Iraq               | 160            | 91197     | 7.938             | 4527.312  | 570.338                         |
| Ireland            | 1758           | 26313     | 388.659           | 5817.613  | 14.968                          |
| Israel             | 2932           | 40283     | 437.598           | 6012.198  | 13.739                          |
| Italy              | 43793          | 477895    | 840.413           | 9171.083  | 10.913                          |
| Jamaica            | 298            | 12284     | 175.365           | 7223.975  | 41.194                          |
| Japan              | 825            | 1055426   | 8.931             | 11423.078 | 1278.994                        |
| Kenya              | 280            | 100001    | 11.708            | 4181.472  | 357.146                         |
| Latvia             | 42             | 12762     | 28.675            | 8713.226  | 303.857                         |
| Lithuania          | 138            | 18810     | 113.903           | 15536.782 | 136.403                         |
| Luxembourg         | 159            | 3454      | 234.104           | 5085.512  | 21.723                          |

Table S3: Current and projected: COVID-19 deaths and YLL rates. (continued)

| Country        | Deaths<br>Current | Projected | YLL rates<br>Current | Projected | Ratio of YLL<br>Current over<br>proj. |
|----------------|-------------------|-----------|----------------------|-----------|---------------------------------------|
| Malawi         | 185               | 35425     | 20.559               | 3934.737  | 191.383                               |
| Malta          | 121               | 2914      | 401.552              | 9662.450  | 24.063                                |
| Mexico         | 122855            | 475425    | 2054.670             | 7951.175  | 3.870                                 |
| Moldova        | 2825              | 19480     | 1052.198             | 7255.512  | 6.896                                 |
| Nepal          | 360               | 103435    | 30.911               | 8881.387  | 287.319                               |
| Netherlands    | 11303             | 112170    | 666.451              | 6613.804  | 9.924                                 |
| New Zealand    | 25                | 27680     | 6.476                | 7170.323  | 1107.200                              |
| Nicaragua      | 164               | 20112     | 52.275               | 6402.933  | 122.485                               |
| Nigeria        | 1163              | 391607    | 10.541               | 3549.960  | 336.779                               |
| Norway         | 353               | 32507     | 85.103               | 7836.956  | 92.088                                |
| Pakistan       | 1688              | 650513    | 15.724               | 6060.030  | 385.398                               |
| Panama         | 720               | 17275     | 366.026              | 8782.092  | 23.993                                |
| Peru           | 37835             | 131010    | 2319.726             | 8032.437  | 3.463                                 |
| Philippines    | 9213              | 368084    | 173.797              | 6943.747  | 39.953                                |
| Poland         | 1132              | 239472    | 41.671               | 8815.485  | 211.548                               |
| Portugal       | 6191              | 74122     | 604.752              | 7240.540  | 11.973                                |
| Romania        | 842               | 121855    | 92.164               | 13337.987 | 144.721                               |
| Sierra Leone   | 72                | 16287     | 15.544               | 3511.335  | 225.895                               |
| Slovakia       | 878               | 31253     | 266.746              | 9495.005  | 35.596                                |
| Slovenia       | 2891              | 14051     | 1278.945             | 6216.000  | 4.860                                 |
| South Africa   | 2413              | 198365    | 72.422               | 5954.112  | 82.214                                |
| South Korea    | 808               | 301352    | 19.466               | 7259.309  | 372.914                               |
| Spain          | 50900             | 321029    | 1219.862             | 7693.764  | 6.307                                 |
| Suriname       | 54                | 2090      | 159.229              | 6162.769  | 38.704                                |
| Sweden         | 6553              | 66393     | 631.694              | 6400.128  | 10.132                                |
| Switzerland    | 7082              | 56606     | 780.948              | 6241.628  | 7.992                                 |
| Taiwan         | 7                 | 179828    | 0.688                | 17681.814 | 25689.714                             |
| Togo           | 66                | 16675     | 17.679               | 4466.559  | 252.652                               |
| Turkey         | 9799              | 337078    | 185.456              | 6379.428  | 34.399                                |
| Ukraine        | 17395             | 260783    | 606.804              | 9097.104  | 14.992                                |
| United Kingdom | 73124             | 489828    | 1228.345             | 8228.183  | 6.699                                 |
| Uruguay        | 90                | 20633     | 36.930               | 8466.471  | 229.256                               |
| USA            | 301671            | 2186315   | 1317.941             | 9551.578  | 7.247                                 |

Table S4: Gender imbalances: COVID-19 YLL rates, COVID-19 death counts, and ages-at-deaths.

| Country            | YLL per death |         | Mean age-at-death |         | Deaths |         |
|--------------------|---------------|---------|-------------------|---------|--------|---------|
|                    | Males         | Females | Males             | Females | Males  | Females |
| Afghanistan        | 18.619        | 21.436  | 60.069            | 58.205  | 1130   | 381     |
| Argentina          | 14.653        | 14.713  | 70.670            | 75.887  | 19786  | 14973   |
| Australia          | 9.790         | 8.273   | 82.951            | 87.372  | 440    | 470     |
| Austria            | 10.160        | 8.893   | 80.768            | 85.516  | 1366   | 1107    |
| Belgium            | 8.705         | 7.429   | 84.363            | 88.977  | 9652   | 10072   |
| Bolivia            | 23.382        | 23.700  | 61.081            | 67.417  | 22     | 12      |
| Brazil             | 17.188        | 18.547  | 68.832            | 71.476  | 106654 | 79753   |
| Cameroon           | 15.855        | 1.880   | 62.841            | 95.160  | 13     | 5       |
| Canada             | 10.368        | 9.814   | 81.290            | 84.954  | 4435   | 4754    |
| Chad               | 15.299        | 20.160  | 65.068            | 59.574  | 70     | 22      |
| Chile              | 16.434        | 16.156  | 71.597            | 75.609  | 8463   | 6314    |
| Colombia           | 17.774        | 17.944  | 69.613            | 71.841  | 31736  | 17929   |
| Croatia            | 13.313        | 11.316  | 73.670            | 80.468  | 208    | 192     |
| Cuba               | 16.928        | 12.815  | 70.278            | 78.520  | 52     | 30      |
| Cyprus             | 18.983        | 9.589   | 66.755            | 83.061  | 32     | 10      |
| Czechia            | 10.869        | 10.224  | 77.418            | 81.335  | 6314   | 4944    |
| Denmark            | 9.954         | 9.879   | 80.393            | 83.823  | 684    | 542     |
| Dominican Republic | 21.556        | 24.216  | 63.639            | 64.502  | 433    | 182     |
| Ecuador            | 19.888        | 21.825  | 66.430            | 67.072  | 7025   | 3590    |
| El Salvador        | 22.036        | 24.526  | 60.747            | 62.500  | 31     | 11      |
| Estonia            | 11.169        | 12.816  | 77.073            | 79.721  | 42     | 69      |
| Eswatini           | 14.960        | 21.446  | 61.056            | 58.674  | 72     | 54      |
| Ethiopia           | 17.595        | 14.297  | 62.500            | 69.167  | 2      | 3       |
| Finland            | 13.200        | 11.657  | 77.122            | 83.115  | 204    | 210     |
| France             | 11.643        | 11.438  | 79.585            | 83.414  | 24268  | 17031   |
| Germany            | 10.617        | 9.308   | 80.794            | 85.119  | 18573  | 16941   |
| Greece             | 12.884        | 11.192  | 78.755            | 82.591  | 2314   | 1556    |
| Hungary            | 11.441        | 10.973  | 75.255            | 80.525  | 264    | 275     |
| Iceland            | 22.463        | 15.151  | 65.958            | 76.225  | 20     | 15      |
| India              | 19.671        | 21.096  | 60.898            | 60.876  | 69887  | 30988   |
| Iraq               | 17.927        | 23.070  | 62.146            | 58.572  | 110    | 50      |
| Ireland            | 11.125        | 10.359  | 80.208            | 83.640  | 914    | 844     |
| Israel             | 13.336        | 11.865  | 77.586            | 81.907  | 1670   | 1262    |
| Italy              | 11.922        | 10.161  | 78.702            | 84.405  | 25257  | 18536   |
| Japan              | 13.002        | 11.769  | 77.850            | 83.991  | 531    | 294     |
| Kenya              | 20.669        | 25.100  | 58.510            | 56.019  | 210    | 70      |
| Latvia             | 11.979        | 12.292  | 75.292            | 79.868  | 23     | 19      |
| Lithuania          | 22.190        | 21.429  | 60.296            | 70.083  | 68     | 70      |
| Luxembourg         | 9.918         | 7.938   | 81.985            | 87.455  | 82     | 77      |
| Malawi             | 18.835        | 24.950  | 57.987            | 54.505  | 141    | 44      |
| Malta              | 15.694        | 8.904   | 74.693            | 85.735  | 90     | 31      |
| Mexico             | 20.744        | 21.932  | 62.993            | 64.463  | 77991  | 44864   |
| Moldova            | 12.759        | 16.808  | 67.560            | 67.880  | 1457   | 1368    |
| Nepal              | 23.248        | 28.083  | 56.092            | 52.662  | 258    | 102     |
| Netherlands        | 10.395        | 9.469   | 80.520            | 84.222  | 6181   | 5122    |
| Nigeria            | 17.811        | 20.577  | 57.915            | 55.668  | 869    | 294     |
| Norway             | 13.735        | 11.192  | 76.635            | 83.367  | 189    | 164     |
| Pakistan           | 19.949        | 21.929  | 60.743            | 58.865  | 1252   | 436     |
| Panama             | 20.530        | 23.431  | 68.164            | 67.886  | 478    | 242     |

Table S4: Gender imbalances: COVID-19 YLL rates, COVID-19 death counts, and ages-at-deaths. (*continued*)

| <b>Country</b> | <b>Males</b> | <b>Females</b> | <b>Males</b> | <b>Females</b> | <b>Males</b> | <b>Females</b> |
|----------------|--------------|----------------|--------------|----------------|--------------|----------------|
| Peru           | 19.163       | 20.778         | 65.959       | 67.618         | 25885        | 11950          |
| Philippines    | 18.633       | 22.120         | 61.686       | 63.880         | 5554         | 3659           |
| Poland         | 13.565       | 13.114         | 73.883       | 79.265         | 630          | 502            |
| Portugal       | 10.161       | 9.244          | 80.822       | 85.255         | 3220         | 2971           |
| Romania        | 18.842       | 23.124         | 63.897       | 63.426         | 500          | 342            |
| Slovakia       | 15.910       | 16.557         | 69.309       | 73.267         | 452          | 426            |
| Slovenia       | 9.597        | 8.374          | 80.879       | 85.929         | 1319         | 1572           |
| Spain          | 11.440       | 10.214         | 80.039       | 84.971         | 27838        | 23062          |
| Sweden         | 10.285       | 8.830          | 81.380       | 86.107         | 3563         | 2990           |
| Switzerland    | 9.817        | 8.402          | 82.529       | 86.895         | 3811         | 3272           |
| Taiwan         | 21.235       | 29.970         | 65.833       | 57.500         | 6            | 1              |
| Togo           | 23.571       | 18.625         | 51.665       | 60.291         | 45           | 21             |
| Turkey         | 15.267       | 15.589         | 70.199       | 74.033         | 6042         | 3756           |
| Ukraine        | 13.132       | 16.531         | 67.968       | 69.026         | 9298         | 8097           |
| United Kingdom | 11.509       | 10.826         | 78.979       | 82.277         | 40213        | 32911          |
| Uruguay        | 12.200       | 14.936         | 75.195       | 78.403         | 59           | 31             |
| USA            | 14.802       | 13.499         | 74.381       | 79.228         | 163633       | 138038         |

Table S5: Ratio of equalizing to current deaths.

| Country            | Equalizing proportion | Country        | Equalizing proportion |
|--------------------|-----------------------|----------------|-----------------------|
| Afghanistan        | 0.409                 | Italy          | 0.593                 |
| Argentina          | 0.724                 | Japan          | 0.474                 |
| Australia          | 0.895                 | Kenya          | 0.401                 |
| Austria            | 0.690                 | Latvia         | 0.722                 |
| Belgium            | 0.866                 | Lithuania      | 0.844                 |
| Bolivia            | 0.552                 | Luxembourg     | 0.776                 |
| Brazil             | 0.779                 | Malawi         | 0.407                 |
| Cameroon           | 0.042                 | Malta          | 0.193                 |
| Canada             | 1.000                 | Mexico         | 0.582                 |
| Chad               | 0.407                 | Moldova        | 1.137                 |
| Chile              | 0.713                 | Nepal          | 0.402                 |
| Colombia           | 0.550                 | Netherlands    | 0.744                 |
| Croatia            | 0.729                 | Nigeria        | 0.402                 |
| Cuba               | 0.428                 | Norway         | 0.717                 |
| Cyprus             | 0.154                 | Pakistan       | 0.406                 |
| Czechia            | 0.715                 | Panama         | 0.579                 |
| Denmark            | 0.778                 | Peru           | 0.494                 |
| Dominican Republic | 0.472                 | Philippines    | 0.789                 |
| Ecuador            | 0.561                 | Poland         | 0.724                 |
| El Salvador        | 0.356                 | Portugal       | 0.751                 |
| Estonia            | 1.687                 | Romania        | 0.793                 |
| Eswatini           | 1.041                 | Slovakia       | 0.929                 |
| Ethiopia           | 1.220                 | Slovenia       | 1.032                 |
| Finland            | 0.889                 | Spain          | 0.711                 |
| France             | 0.647                 | Sweden         | 0.728                 |
| Germany            | 0.782                 | Switzerland    | 0.723                 |
| Greece             | 0.563                 | Taiwan         | 0.232                 |
| Hungary            | 0.906                 | Togo           | 0.359                 |
| Iceland            | 0.505                 | Turkey         | 0.619                 |
| India              | 0.514                 | Ukraine        | 0.946                 |
| Iraq               | 0.598                 | United Kingdom | 0.752                 |
| Ireland            | 0.848                 | Uruguay        | 0.601                 |
| Israel             | 0.666                 | USA            | 0.754                 |

Table S6: Weighted Averages for Figure 1: Ratios of COVID YLL to Other Causes of Mortality

|   | Ratio                                    | Deaths Weighted Average |
|---|------------------------------------------|-------------------------|
| 1 | Ratio COVID YLL to Flu (median year) YLL | 0.793                   |
| 2 | Ratio COVID YLL to Flu (max year) YLL    | 0.557                   |
| 3 | Ratio COVID YLL to Transport YLL         | 0.572                   |
| 4 | Ratio COVID YLL to Heart disease YLL     | 0.096                   |
| 5 | Ratio COVID YLL to Excess mortality YLL  | 0.043                   |

Table S7: Weighted Proportions for Figure 2: Proportion of total global YLL by age

|   | Age      | Weighted Avg |
|---|----------|--------------|
| 1 | Under 55 | 0.3017       |
| 2 | 55-75    | 0.4487       |
| 3 | 75+      | 0.2496       |



## References

1. Martinez R, Soliz P, Caixeta R, and Ordunez P. Reflection on modern methods: years of life lost due to premature mortality—a versatile and comprehensive measure for monitoring non-communicable disease mortality. *International Journal of Epidemiology* 2019;48:1367–76.
2. Dicker D, Nguyen G, Abate D, et al. Global, regional, and national age-sex-specific mortality and life expectancy, 1950–2017: a systematic analysis for the Global Burden of Disease Study 2017. *The Lancet* 2018;392:1684–735.
3. Global Health Data Exchange — GHDx. 2020. URL: <http://ghdx.healthdata.org/> (visited on 06/01/2020).
4. Goldstein E, Viboud C, Charu V, and Lipsitch M. Improving the estimation of influenza-related mortality over a seasonal baseline. *Epidemiology (Cambridge, Mass.)* 2012;23:829–38.
5. Acosta E, Hallman SA, Dillon LY, et al. Determinants of Influenza Mortality Trends: Age-Period-Cohort Analysis of Influenza Mortality in the United States, 1959–2016. *Demography* 2019;56:1723–46.
6. Human Mortality Database. Available at [www.mortality.org](http://www.mortality.org) or [www.humanmortality.de](http://www.humanmortality.de) publisher: University of California, Berkeley (USA), and Max Planck Institute for Demographic Research (Germany). 2020. URL: <https://www.mortality.org/> (visited on 06/17/2020).
7. Walker PGT, Whittaker C, Watson OJ, et al. The impact of COVID-19 and strategies for mitigation and suppression in low- and middle-income countries. *Science* 2020;369:413–22.
